# Supplementary material for: Density functional study of the phase stability and Raman spectra of Yb2O3, Yb2SiO5 and Yb2Si2O7 under pressure
Source: Royal Society of Chemistry journal article supplement (doi:10.1039/c8cp02497a), 2018-01-01
Supplement: c8cp02497a1.pdf [file c8cp02497a1.pdf]

## Electronic supplementary information (ESI): Density functional study of phase stabilities and Raman spectra of $\text{Yb}_2\text{O}_3$ , $\text{Yb}_2\text{SiO}_5$ and $\text{Yb}_2\text{Si}_2\text{O}_7$ under pressure

Takafumi Ogawa,<sup>\*a</sup> Noriko Otani,<sup>a</sup> Taishi Yokoi,<sup>b</sup> Craig A. J. Fisher,<sup>a</sup> Akihide Kuwabara,<sup>a,c</sup> Hiroki Moriwake,<sup>a,c</sup> Masato Yoshiya,<sup>a,d</sup> Satoshi Kitaoka,<sup>b</sup> and Masasuke Takata<sup>a,b</sup>

### 1 Dependence of Raman spectra on hydrostatic pressure

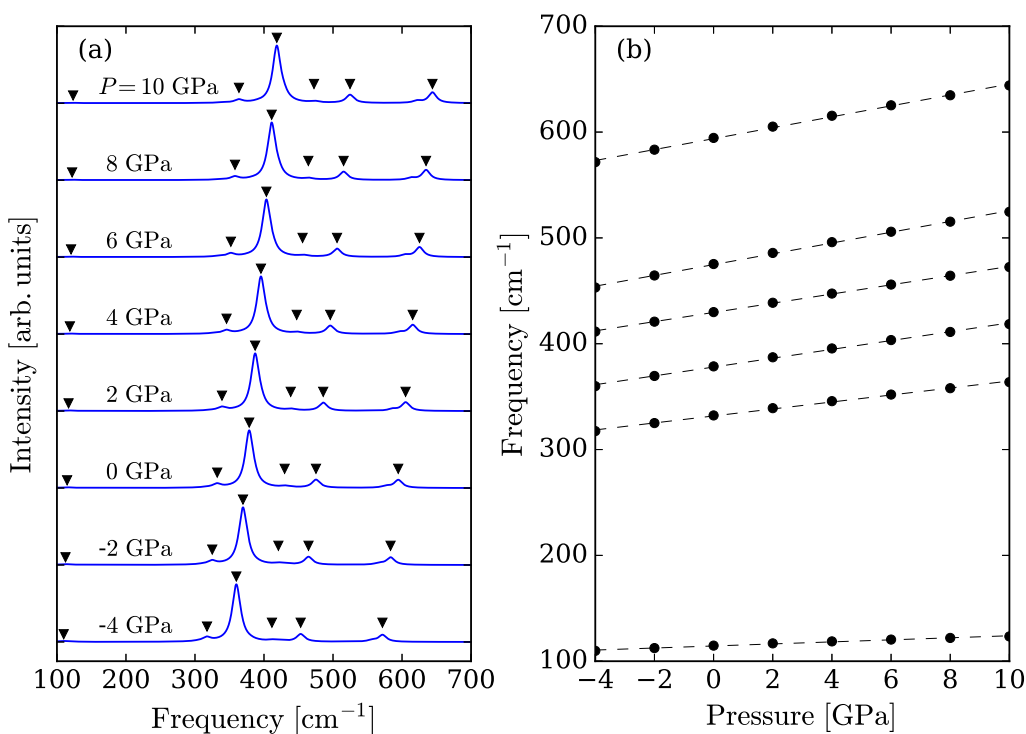

**Fig. S1** Dependence of (a) Raman spectra and (b) peak positions of C-type  $\text{Yb}_2\text{O}_3$  on hydrostatic pressure.

<sup>a</sup> Nanostructures Research Laboratory, Japan Fine Ceramics Center, Nagoya 456-8587, Japan. E-mail: t\_ogawa@jfcc.or.jp

<sup>b</sup> Materials Research and Development Laboratory, Japan Fine Ceramics Center, Nagoya 456-8587, Japan.

<sup>c</sup> Center for Materials Research by Information Integration, National Institute for Materials Science, Tsukuba 305-0047, Japan

<sup>d</sup> Department of Adaptive Machine Systems, Osaka University, Osaka 565-0871, Japan

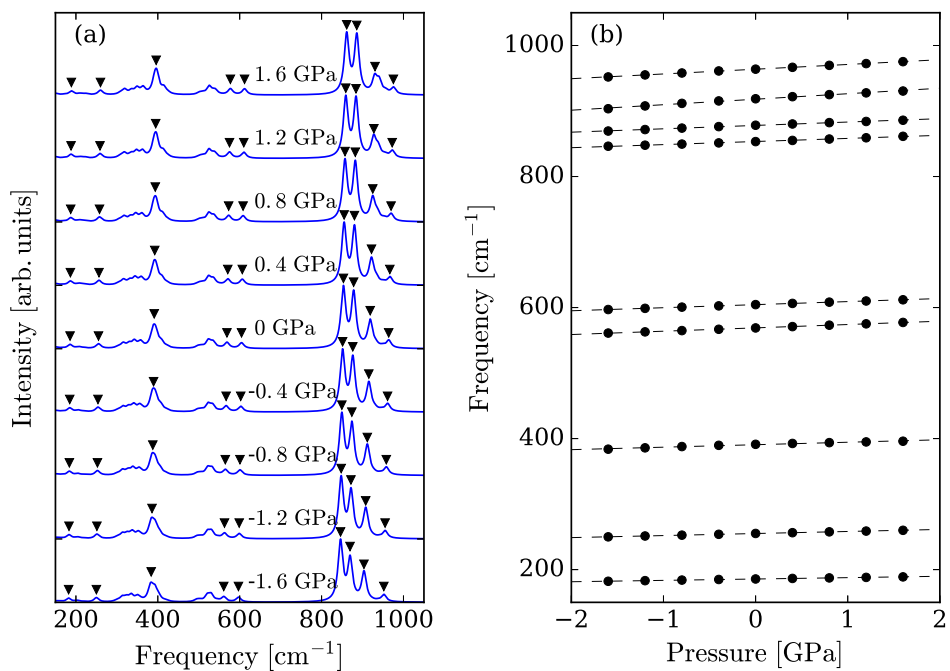

Fig. S2 Dependence of (a) Raman spectra and (b) peak positions of  $X_2\text{-Yb}_2\text{SiO}_5$  on hydrostatic pressure.

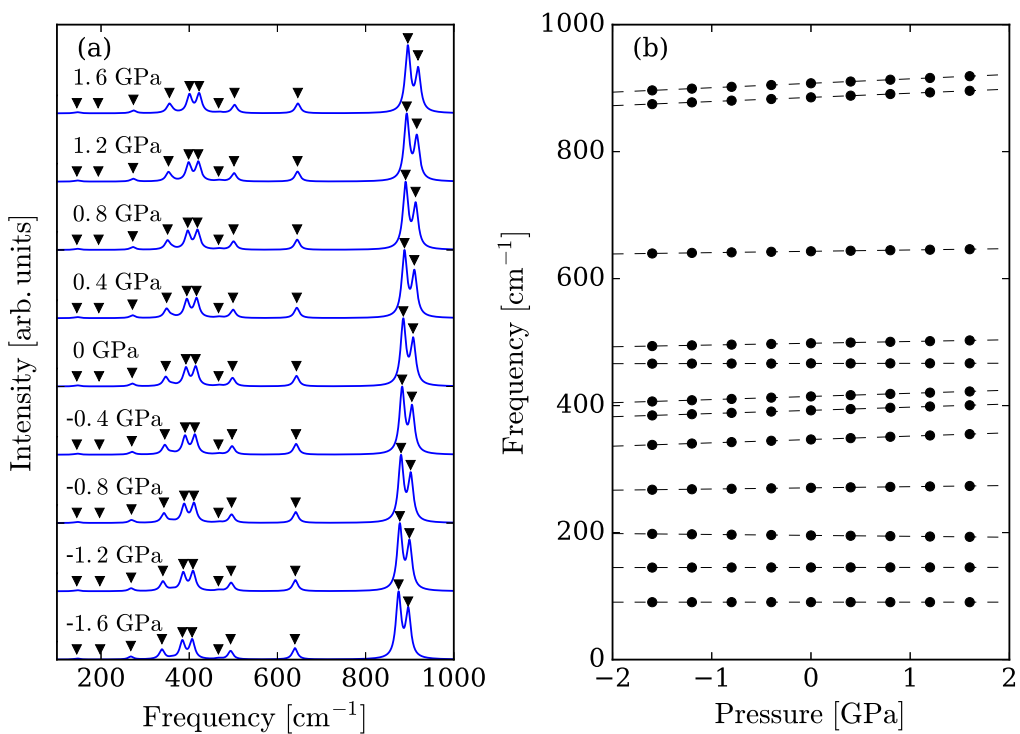

Fig. S3 Dependence of (a) Raman spectra and (b) peak positions of  $\beta\text{-Yb}_2\text{Si}_2\text{O}_7$  on hydrostatic pressure.

## 2 Vibrations of $\text{Si}_x\text{O}_y$ tetrahedral units in $\text{Yb}_2\text{SiO}_5$ and $\text{Yb}_2\text{Si}_2\text{O}_7$

The parameter used to measure maximum deviation in a bond length during vibration is defined in the manuscript as

$$\Delta l_{ij} = \frac{r_{ij}^2 - r_{ij}^0{}^2}{r_{ij}^0 A}. \quad (1)$$

Since expressing the interatomic vector by the atomic positions and vibrational displacement vectors leads to

$$\mathbf{r}_{ij} = (\mathbf{r}_j^0 + \mathbf{u}_j) - (\mathbf{r}_i^0 + \mathbf{u}_i) = \mathbf{r}_{ij}^0 + \mathbf{u}_j - \mathbf{u}_i, \quad (2)$$

the parameter,  $\Delta l_{ij}$ , can be rewritten as

$$\Delta l_{ij} = 2 \frac{\mathbf{r}_{ij}^0 \cdot (\mathbf{u}_j - \mathbf{u}_i)}{r_{ij}^0 A} + \frac{(\mathbf{u}_j - \mathbf{u}_i)^2}{r_{ij}^0 A}. \quad (3)$$

The second term on the right hand side of this equation vanishes when  $A$  is sufficiently smaller than  $r_{ij}^0$  ( $A/r_{ij}^0 \rightarrow 0$ ), leading to a converged value of  $\Delta l_{ij}$  in the limit of small  $A$ . To confirm this behaviour, the dependence of  $\Delta l_{ij}$  on  $A$  is examined for a mode of  $\text{X}_2\text{-Yb}_2\text{SiO}_5$  as shown in Fig. S4. From the figure, we can see that the  $\Delta l_{ij}$  changes slightly for  $A < 10^{-2}$ . In this study, we used  $A = 10^{-3}$  to calculate  $\Delta l_{ij}$ . The bond lengths between Si and O atoms and vibrational amplitudes,  $u_i^2/A^2$  and  $\Delta l_{ij}$ , for characteristic modes with frequencies above  $600 \text{ cm}^{-1}$  are shown in Figs. S5 – S10, where the structural pictures of  $\text{Si}_x\text{O}_y$  were drawn using VESTA<sup>1</sup> and Raman spectra which were broadened by  $7.0$  and  $0.05 \text{ cm}^{-1}$  wide Lorentzians are shown by blue and red lines, respectively. The bond lengths in  $\text{Si}_3\text{O}_{10}$  and  $\text{SiO}_4$  units in  $\alpha\text{-Yb}_2\text{Si}_2\text{O}_7$  are summarised in Table S1.

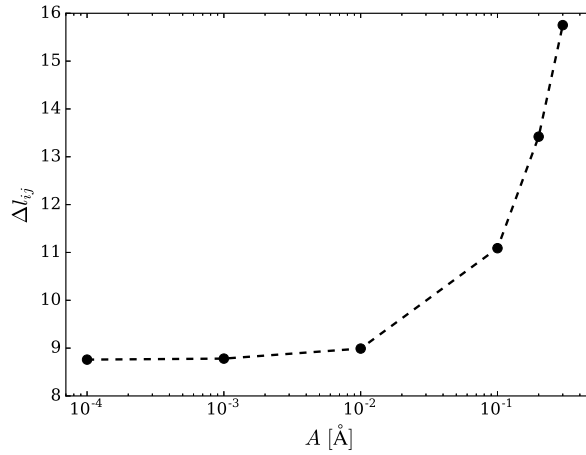

**Fig. S4** Dependence of maximum deviations in a bond length,  $\Delta l_{ij}$ , on an amplitude,  $A$ , for the Si-O4 bond in  $\text{X}_2\text{-Yb}_2\text{SiO}_5$  for the  $853 \text{ cm}^{-1}$  peak, shown in Fig. S5 (f).

## References

- 1 K. Momma, F. Izumi, *J. Appl. Crystallogr.*, 2011, **44**, 1272–1276.

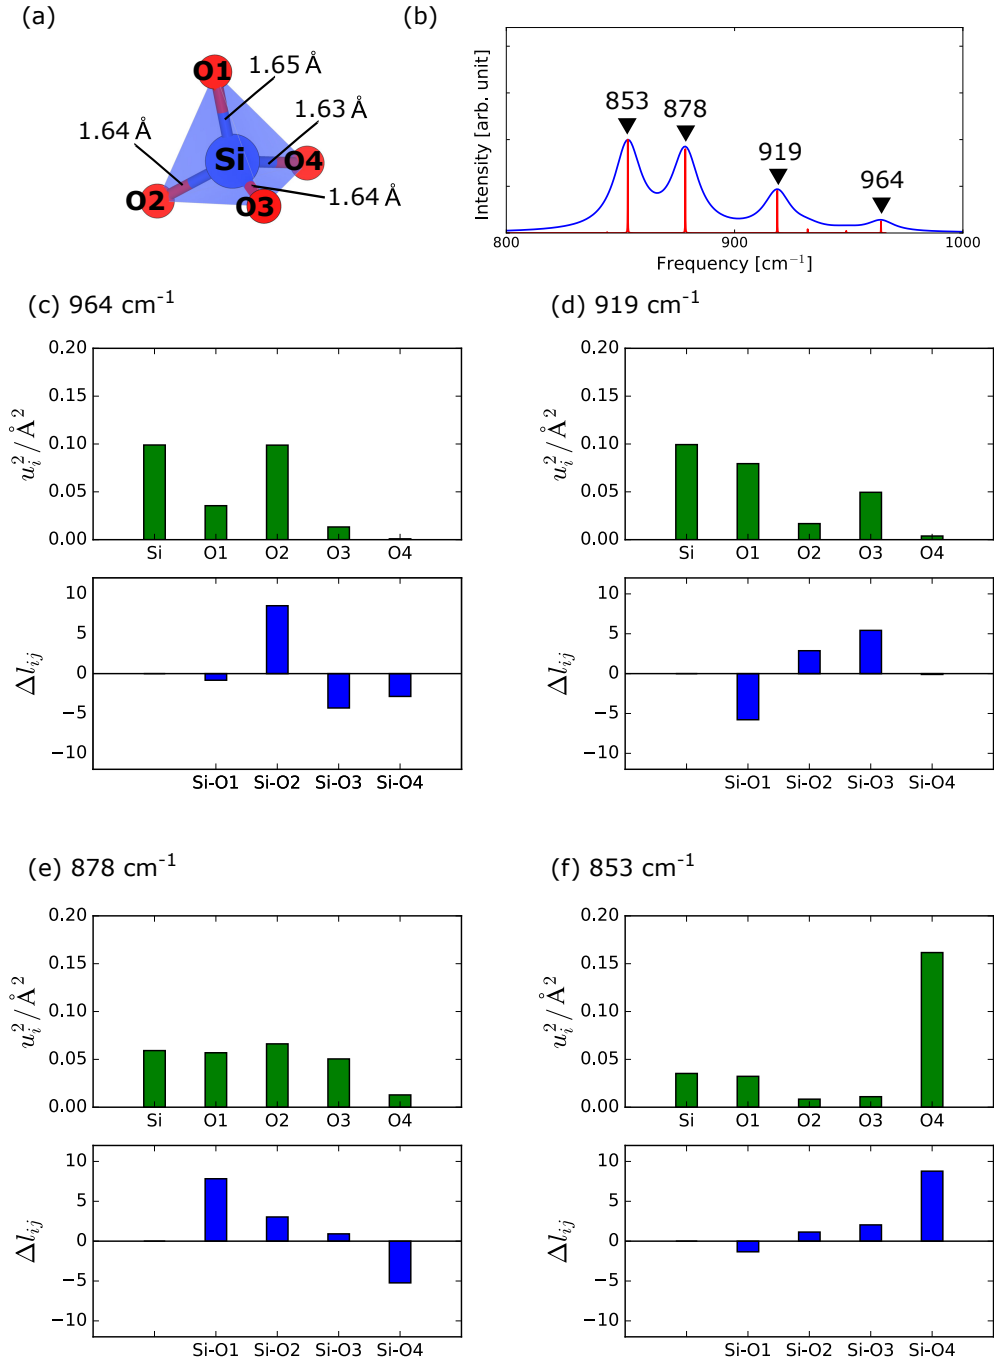

**Fig. S5** (a) Structure of the SiO<sub>4</sub> unit in X<sub>2</sub>-Yb<sub>2</sub>SiO<sub>5</sub>, (b) high frequency range of the calculated Raman spectrum of X<sub>2</sub>-Yb<sub>2</sub>SiO<sub>5</sub>, and (c-f) vibrational amplitudes and  $\Delta l_{ij}$  for the normal modes at 964, 919, 878, and 853 cm<sup>-1</sup>, respectively.

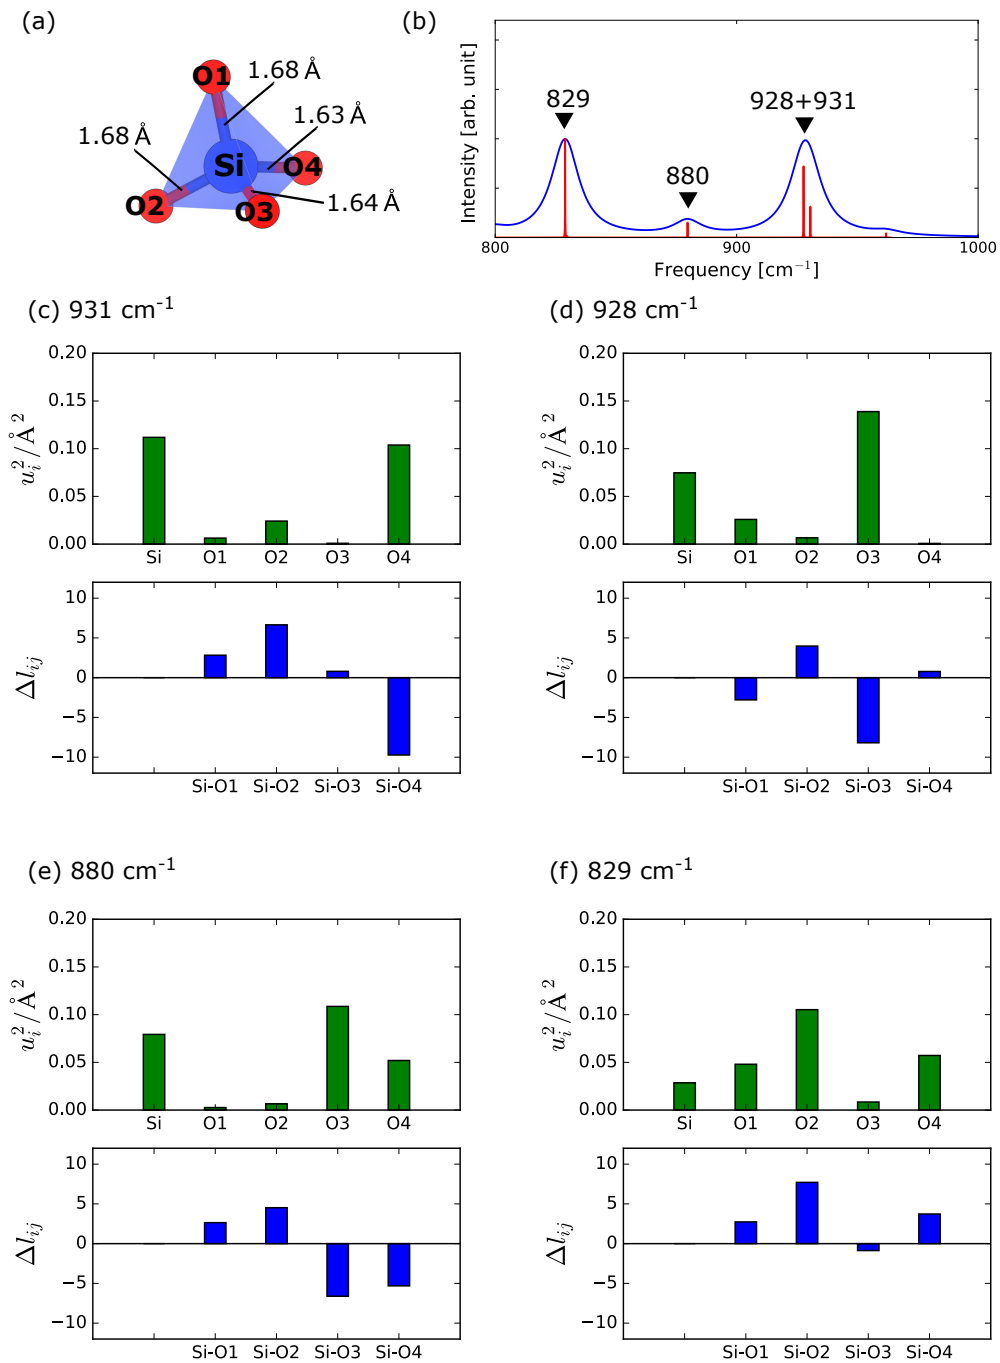

**Fig. S6** (a) Structure of the  $\text{SiO}_4$  unit in  $\text{X}_1\text{-Yb}_2\text{SiO}_5$ , (b) high frequency range of the calculated Raman spectrum of  $\text{X}_1\text{-Yb}_2\text{SiO}_5$ , and (c-f) vibrational amplitudes and  $\Delta l_{ij}$  for the normal modes at 931, 928, 880, and 829  $\text{cm}^{-1}$ , respectively.

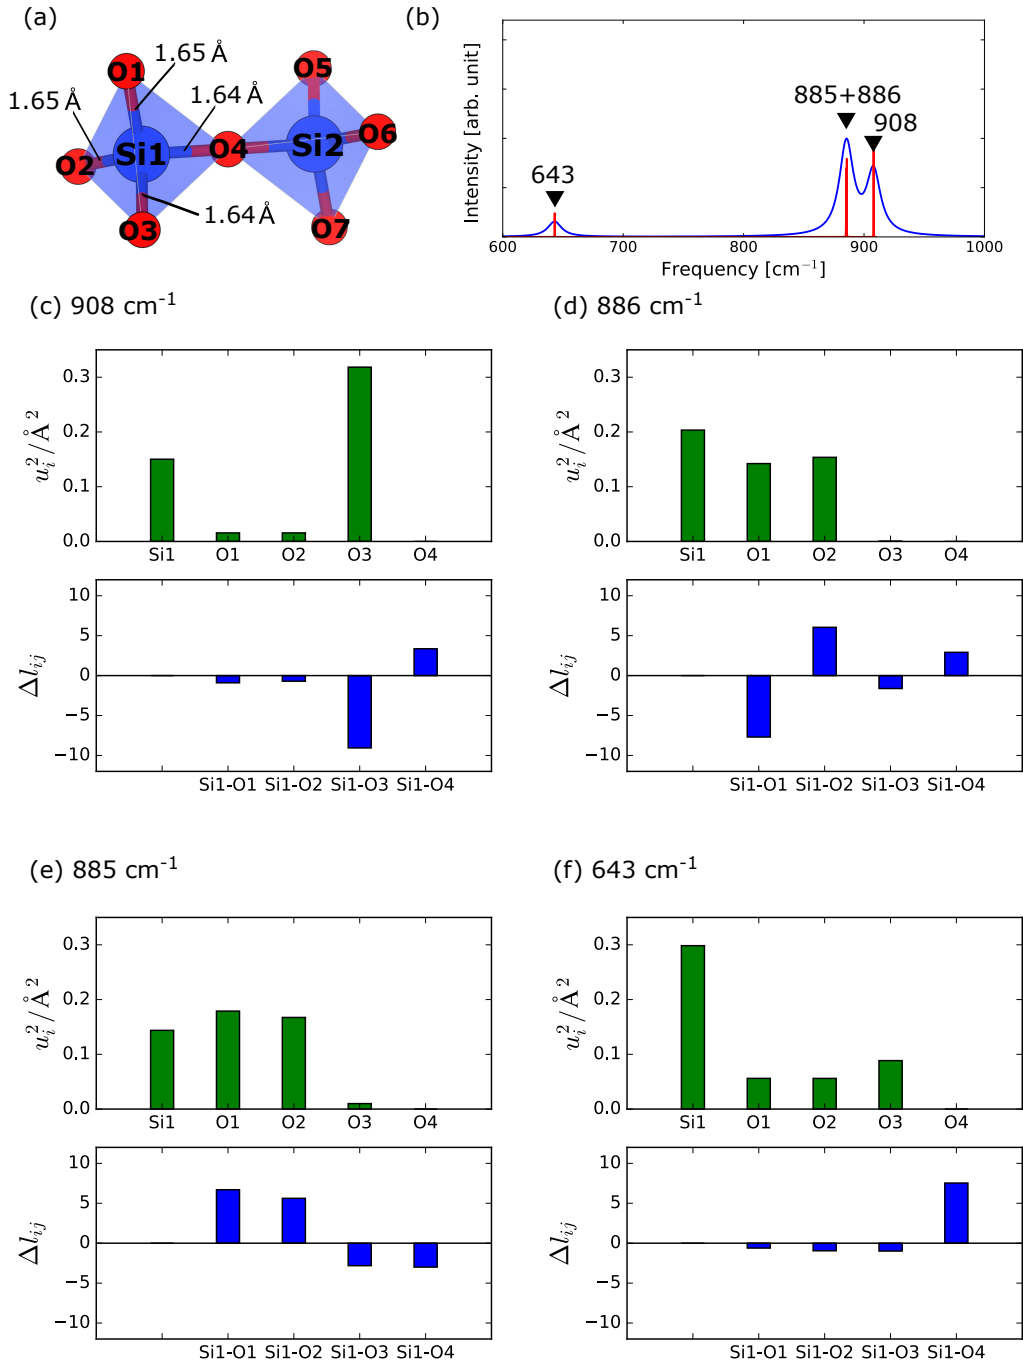

**Fig. S7** (a) Structure of the  $\text{Si}_2\text{O}_7$  unit in  $\beta\text{-Yb}_2\text{Si}_2\text{O}_7$ , (b) high frequency range of the calculated Raman spectrum of  $\beta\text{-Yb}_2\text{Si}_2\text{O}_7$ , and (c-f) vibrational amplitudes and  $\Delta l_{ij}$  for the normal modes at 908, 886, 885, and 643  $\text{cm}^{-1}$ , respectively.

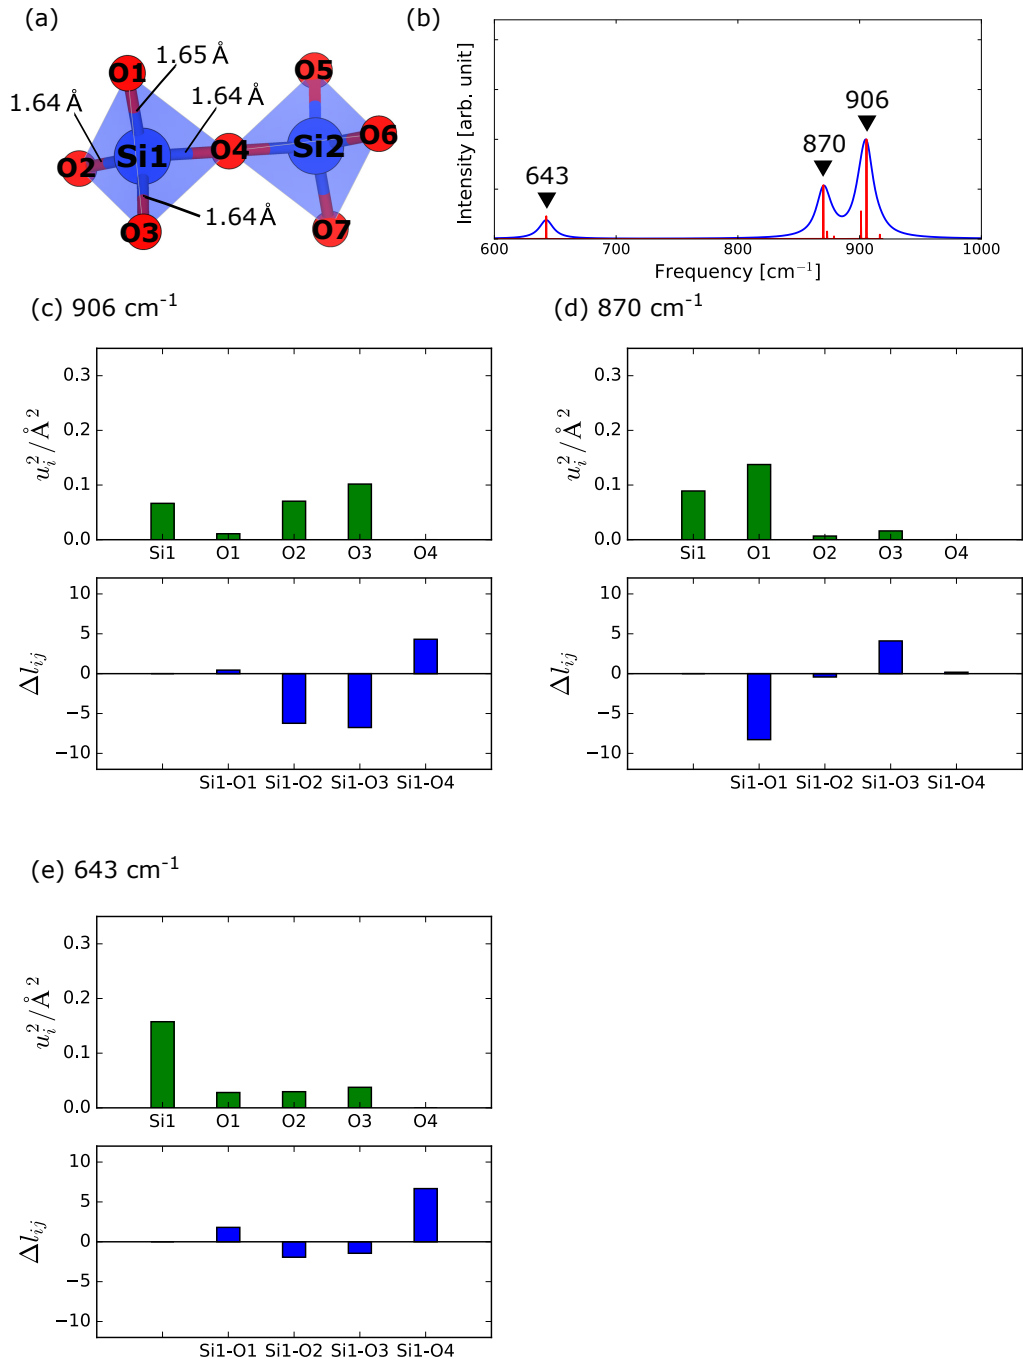

**Fig. S8** (a) Structure of the  $\text{Si}_2\text{O}_7$  unit in  $\gamma\text{-Yb}_2\text{Si}_2\text{O}_7$ , (b) high frequency range of the calculated Raman spectrum of  $\gamma\text{-Yb}_2\text{Si}_2\text{O}_7$ , and (c-e) vibrational amplitudes and  $\Delta l_{ij}$  for the normal modes at 906, 870, and 643  $\text{cm}^{-1}$ , respectively.

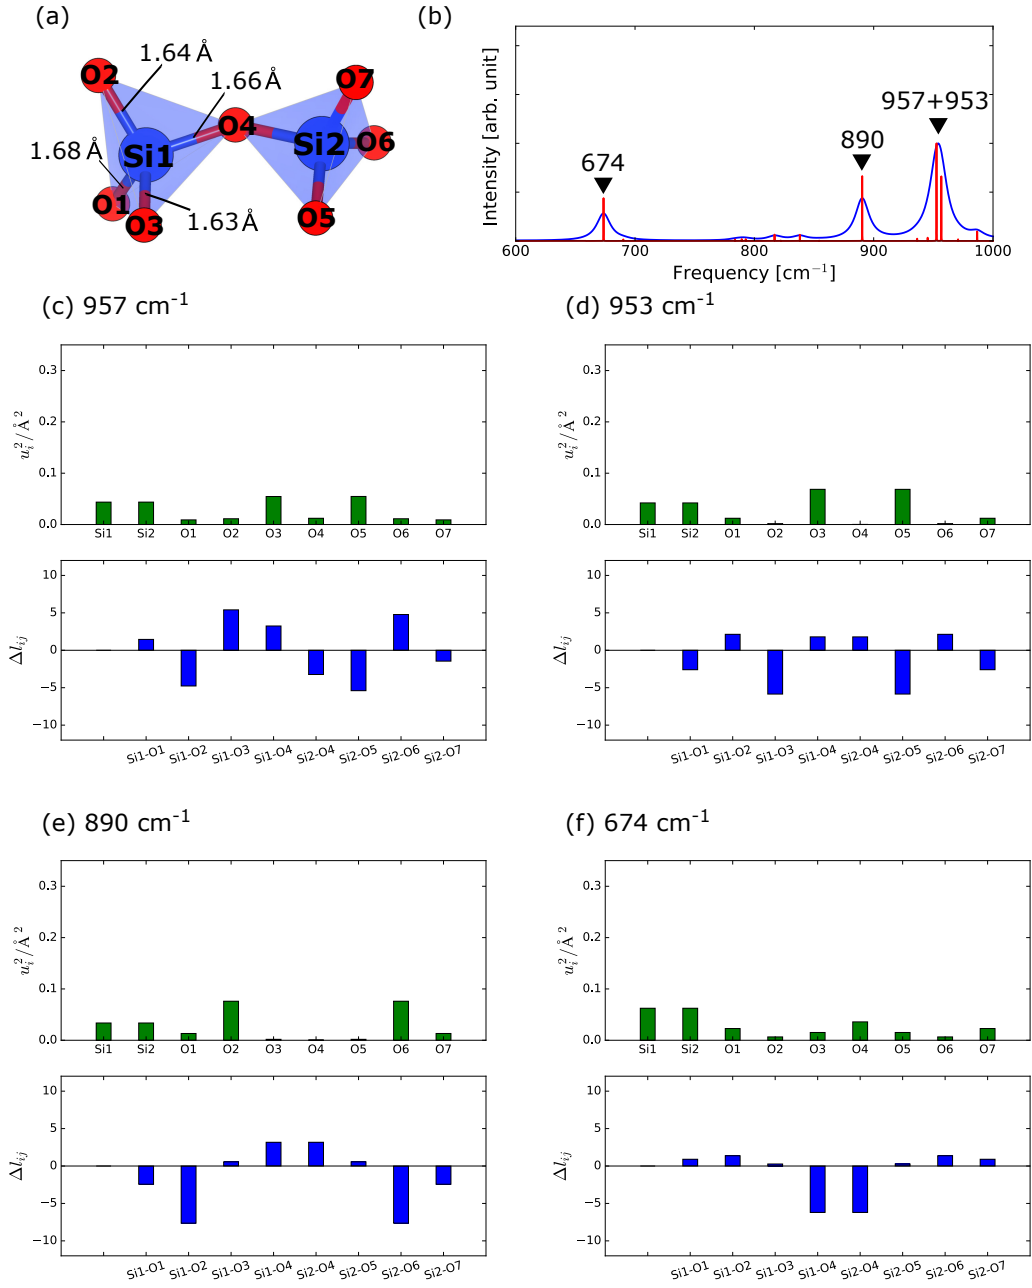

**Fig. S9** (a) Structure of the  $\text{Si}_2\text{O}_7$  unit in  $\text{X-Yb}_2\text{Si}_2\text{O}_7$ , (b) high frequency range of the calculated Raman spectrum of  $\text{X-Yb}_2\text{Si}_2\text{O}_7$ , and (c-f) vibrational amplitudes and  $\Delta l_{ij}$  for the normal modes at 957, 953, 890, and 674  $\text{cm}^{-1}$ , respectively.



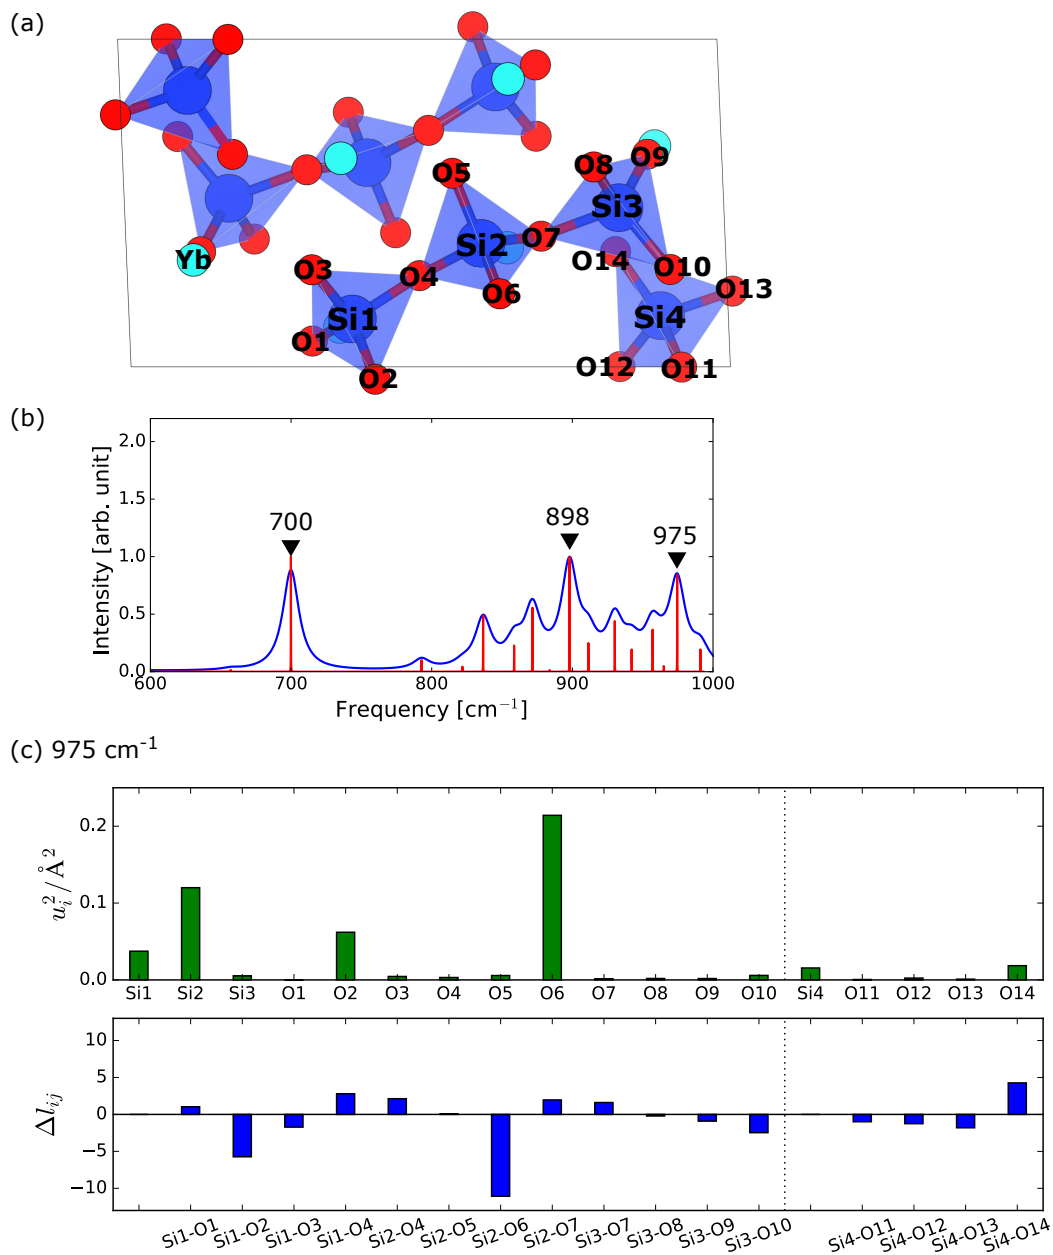

**Fig. S10** (a) Structure of the  $\text{Si}_2\text{O}_7$  unit in  $\alpha\text{-Yb}_2\text{Si}_2\text{O}_7$ , (b) high frequency range of the calculated Raman spectrum of  $\alpha\text{-Yb}_2\text{Si}_2\text{O}_7$ , and (c) vibrational amplitudes and  $\Delta l_{ij}$  for the normal mode at  $975\text{ cm}^{-1}$ .

(e) 898  $\text{cm}^{-1}$

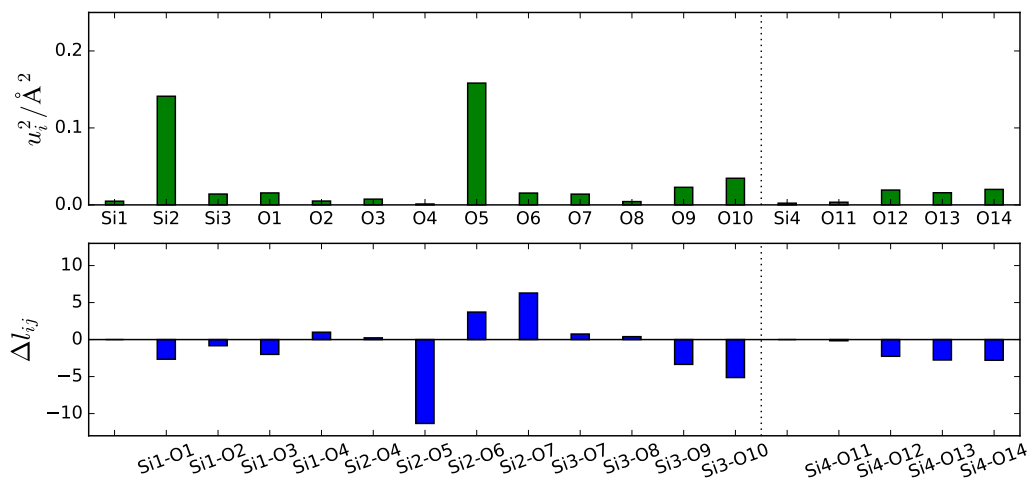

(f) 700  $\text{cm}^{-1}$

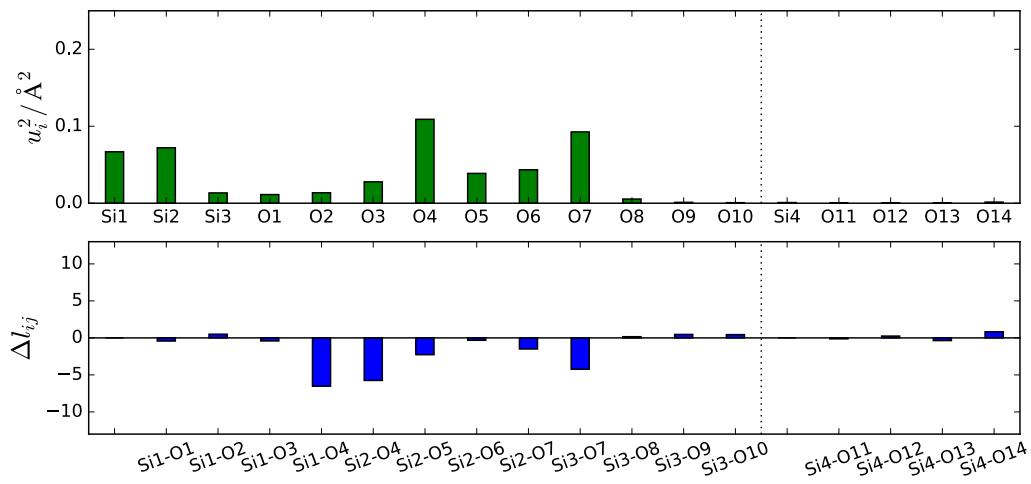

Fig. S10 (Continued) (d, e) normalized amplitudes and bond deviations for the normal modes at 898, and 700  $\text{cm}^{-1}$ , respectively.

**Table S1** Bond lengths between Si and O atoms in  $\alpha$ -Yb<sub>2</sub>Si<sub>2</sub>O<sub>7</sub>.

| Bonds   | Bond length [Å] |
|---------|-----------------|
| Si1-O1  | 1.62            |
| Si1-O2  | 1.64            |
| Si1-O3  | 1.66            |
| Si1-O4  | 1.66            |
| Si2-O4  | 1.66            |
| Si2-O5  | 1.64            |
| Si2-O6  | 1.62            |
| Si2-O7  | 1.68            |
| Si3-O7  | 1.75            |
| Si3-O8  | 1.65            |
| Si3-O9  | 1.63            |
| Si3-O10 | 1.63            |
| Si4-O11 | 1.67            |
| Si4-O12 | 1.64            |
| Si4-O13 | 1.62            |
| Si4-O14 | 1.62            |
